# Supplementary material
Source: PubMed Central journal article supplement (PMC3608716)
Supplement: NIHMS442525-supplement-01.pdf [file NIHMS442525-supplement-01.pdf]

**Supplemental Tables**

**Supplemental Table 1. Participant Demographics**

| Self reported race       |    | Age group |    | Educational Attainment |    | Marital Status    |    | Vaginal Deliveries |    |
|--------------------------|----|-----------|----|------------------------|----|-------------------|----|--------------------|----|
| White                    | 84 | 18-24     | 21 | Graduate degree        | 24 | Currently Married | 64 | None               | 55 |
| Asian                    | 12 | 25-29     | 16 | Bachelor's degree      | 28 | Never Married     | 31 | One                | 8  |
| African-American / Black | 2  | 30-39     | 14 | Associate's degree     | 16 | Divorced          | 3  | Two                | 29 |
| Did not answer           | 1  | 40-44     | 16 | Some college           | 15 | Widowed           | 1  | Three or more      | 7  |
|                          |    | 45-49     | 15 | High School/ GED       | 16 |                   |    |                    |    |
|                          |    | 50-55     | 17 |                        |    |                   |    |                    |    |

**Supplemental Table 2. Ranking Data Results**

| Shape     | 1 <sup>st</sup> choice | 2 <sup>nd</sup> choice | 3 <sup>rd</sup> choice | 4 <sup>th</sup> choice | 5 <sup>th</sup> choice |
|-----------|------------------------|------------------------|------------------------|------------------------|------------------------|
| Round     |                        |                        |                        |                        |                        |
| Oval      | 11%                    | 17%                    | 20%                    | 22%                    | 29%                    |
| Long Oval | 24%                    | 28%                    | 26%                    | 18%                    | 3%                     |
| Tear Drop | 20%                    | 13%                    | 18%                    | 26%                    | 22%                    |
| Bullet    | 33%                    | 21%                    | 26%                    | 16%                    | 3%                     |
| Tampon    | 11%                    | 20%                    | 9%                     | 17%                    | 42%                    |
